# Supplementary material for: The effect of the metal and selenium precursors on the properties of NbSe2and Nb2Se9nanostructures and their application in dye-sensitized solar cells
Source: Royal Society of Chemistry journal article supplement (doi:10.1039/d0ra10894d), 2021-01-01
Supplement: d0ra10894d1.pdf [file d0ra10894d1.pdf]

## Electronic Supporting Information

### **The effect of the metal and selenium precursors on the properties of NbSe<sub>2</sub> and Nb<sub>2</sub>Se<sub>9</sub> nanostructures and their application in dye-sensitized solar cells**

T. Kolokoto<sup>1</sup>, V. Mashindi<sup>1</sup>, R. Kadzutu-Sithole<sup>1</sup>, Lerato F.E. Machogo-Phao<sup>1,2</sup>, Z.B. Ndala, N.P. Shumbula<sup>1</sup>, S.S. Nkabinde<sup>1</sup>, G.N. Ngubeni<sup>1</sup>, S.S. Gqoba<sup>1</sup>, K.P. Mubiayi<sup>1\*</sup> and N. Moloto<sup>1\*</sup>

*<sup>1</sup>Molecular Sciences Institute, School of Chemistry, University of the Witwatersrand, Private Bag 3, Wits, 2050, South Africa*

*<sup>2</sup>Analytical Services Division, Mintek, 200 Malibongwe Drive, Randburg, South Africa*

\*Corresponding authors: K.P. Mubiayi and N. Moloto

Email: [Kalenga.Mubiayi@wits.ac.za](mailto:Kalenga.Mubiayi@wits.ac.za); [Nosipho.Moloto@wits.ac.za](mailto:Nosipho.Moloto@wits.ac.za)

Tel: +2711 717 6720; +2711 717 6774

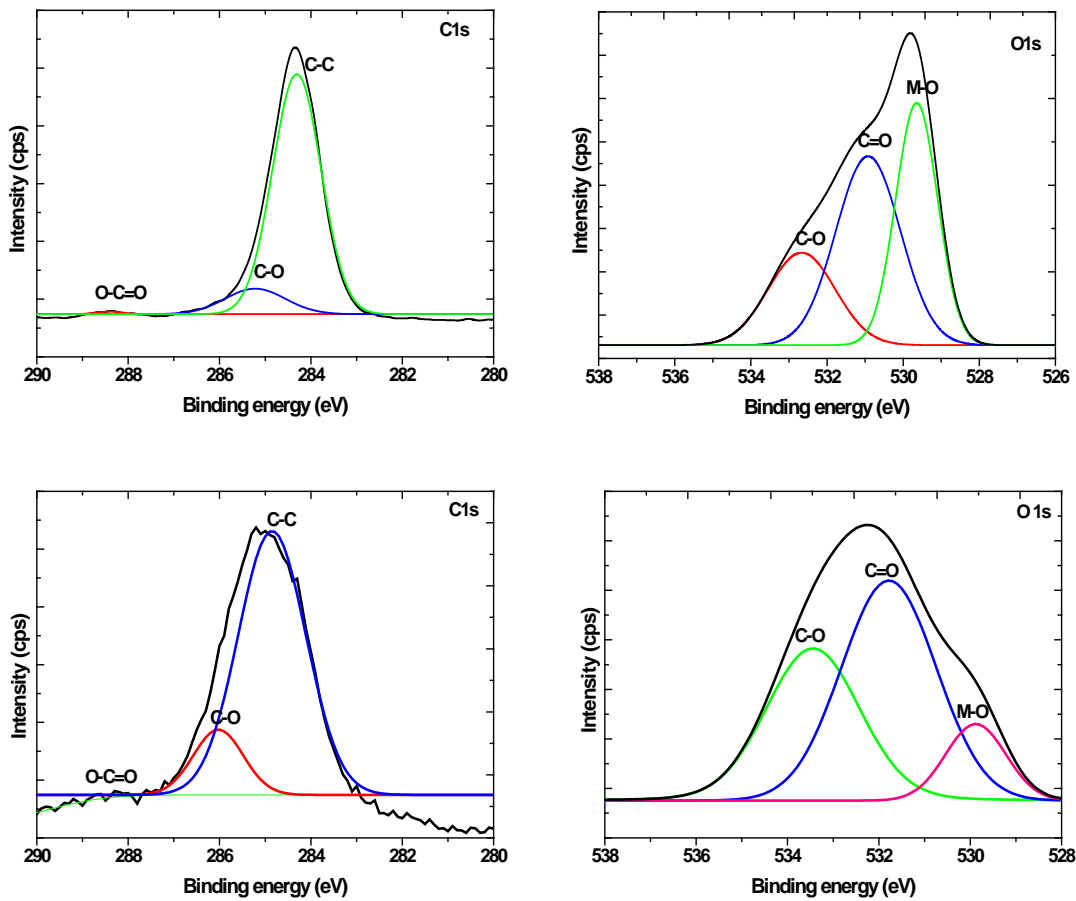

**Fig. 1S: C1s and O1s high resolution spectra for NbSe<sub>2</sub> and Nb<sub>2</sub>Se<sub>9</sub> when varying the niobium precursors.**

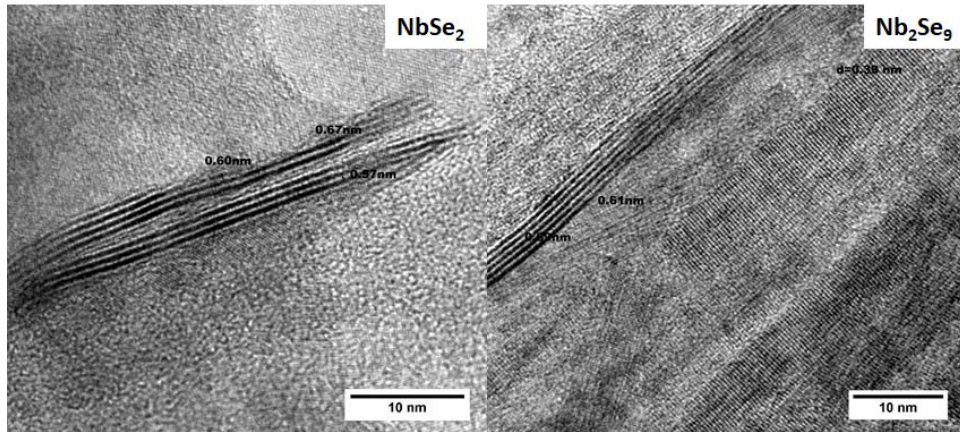

Fig. 2S: HRTEM of  $\text{NbSe}_2$  and  $\text{Nb}_2\text{Se}_9$  when varying the selenium precursors.

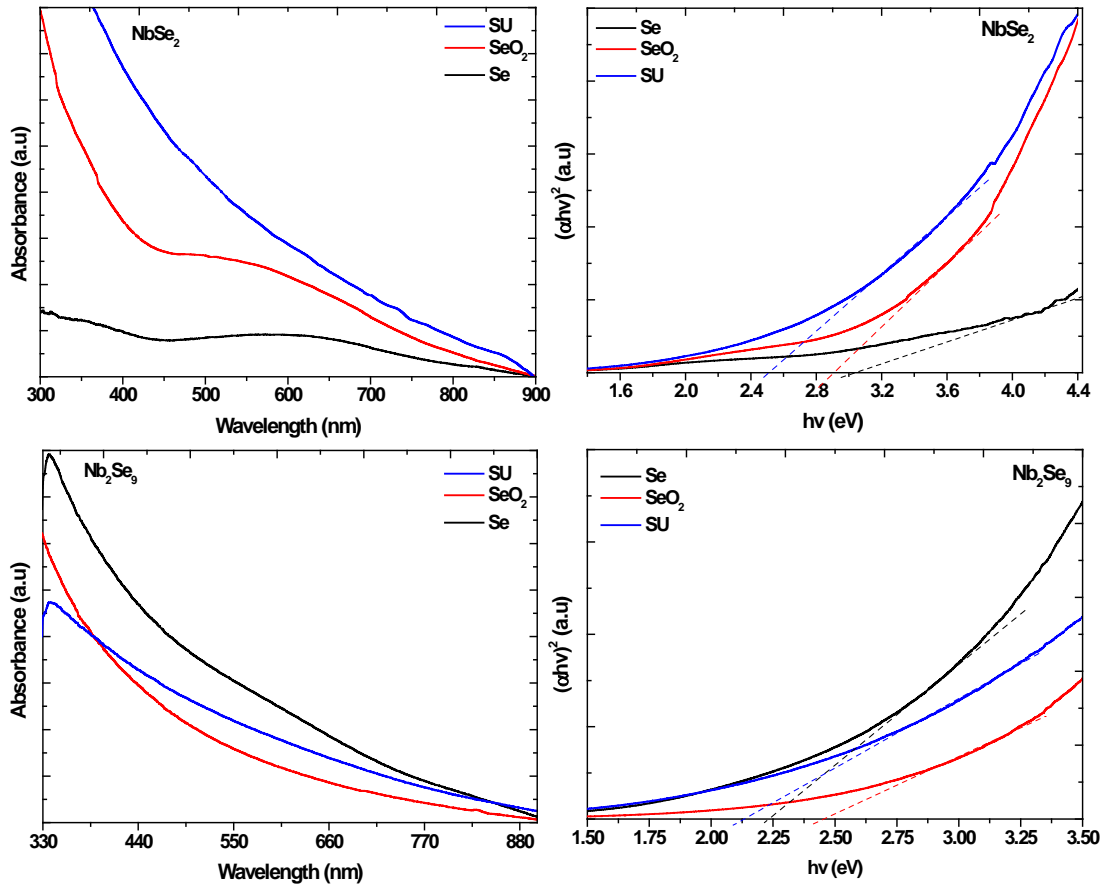

**Fig. 3S: UV-vis absorption spectra for NbSe<sub>2</sub> and Nb<sub>2</sub>Se<sub>9</sub> when varying the selenium precursors.**
